# Supplementary material for: Sarcopenia is poor risk for unfavorable short- and long-term outcomes in stage I non-small cell lung cancer
Source: PubMed Central journal article supplement — Ann Transl Med. 2021 Feb;9(4):325. doi: 10.21037/atm-20-4380 (PMC7944314; doi:10.21037/atm-20-4380), 2021-02
Supplement: atm-09-04-325-supplementary.pdf [file atm-09-04-325-supplementary.pdf]

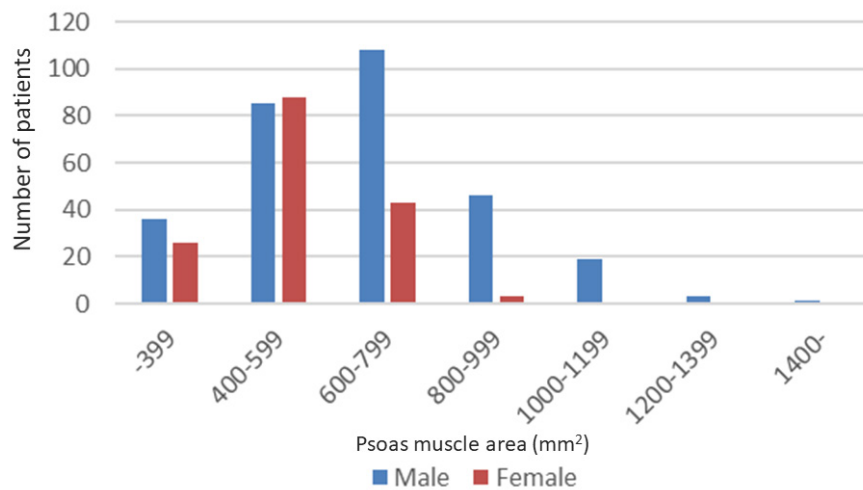

**Figure S1** A bar graph that demonstrates distribution of psoas muscle area according to sex.

**Table S1** Frequency of postoperative severe complications

| Complications                                  | N  |
|------------------------------------------------|----|
| Acute respiratory distress syndrome            | 3  |
| Pneumonia                                      | 14 |
| Pulmonary fistula                              | 41 |
| Bronchopleural fistula                         | 3  |
| Pleural effusion                               | 3  |
| Atelectasis                                    | 15 |
| Atrial fibrillation                            | 18 |
| Cerebral infarction                            | 4  |
| Myocardial infarction                          | 2  |
| Pleural infection                              | 4  |
| Chylothorax                                    | 8  |
| Delirium                                       | 2  |
| Heart failure                                  | 1  |
| Acute exacerbation of interstitial pneumonitis | 2  |
| Wound infection                                | 4  |

**Table S2** Multivariable logistic regression analysis of recurrence-free survival

| Variables                                | Univariable analysis |             |          | Multivariable analysis |             |          |
|------------------------------------------|----------------------|-------------|----------|------------------------|-------------|----------|
|                                          | Hazard ratio         | 95% CI      | P value* | Hazard ratio           | 95% CI      | P value* |
| Body mass index <18.5 (vs. ≥18.5)        | 1.542                | 0.654–2.674 | 0.194    | N/A                    | –           | –        |
| Age ≥70 y/o (vs. <70 y/o)                | 1.593                | 1.051–2.415 | 0.022    | 1.594                  | 1.065–2.319 | 0.034    |
| Male (vs. female)                        | 1.542                | 1.009–2.325 | 0.043    | 1.361                  | 0.897–2.212 | 0.119    |
| Smoking index ≥400 pack-years (vs. <400) | 1.567                | 1.034–2.376 | 0.034    | 1.272                  | 0.691–2.238 | 0.574    |
| Diabetes (vs. non-diabetes)              | 1.368                | 0.694–2.168 | 0.282    | N/A                    | –           | –        |
| Serum CEA ≥5.0 ng/mL (vs. <5.0 ng/mL)    | 1.034                | 1.021–1.049 | <0.001   | 1.037                  | 1.021–1.056 | <0.001   |
| %FVC <80.0 (vs. ≥80.0)                   | 1.043                | 0.467–2.428 | 0.814    | N/A                    | –           | –        |
| FEV1/FVC% <70.0 (vs. ≥70.0)              | 0.938                | 0.609–1.437 | 0.762    | N/A                    | –           | –        |
| Sarcopenia (vs. non-sarcopenia)          | 2.316                | 1.592–3.324 | <0.001   | 1.914                  | 1.237–2.894 | 0.005    |
| Non-adenocarcinoma (vs. adenocarcinoma)  | 1.512                | 0.897–1.983 | 0.112    | N/A                    | –           | –        |
| Pathologic stage IB (vs. IA)             | 1.386                | 0.906–2.092 | 0.124    | N/A                    | –           | –        |

\*, Cox-regression analysis was used. CI, confidence interval; CEA, carcinoembryonic antigen; FEV1, forced expiratory volume in 1 second; FVC, forced vital capacity.
